# Supplementary material for: Random errors in protein synthesis activate an age-dependent program of muscle atrophy in mice
Source: PubMed Central journal article supplement (PMC8187632; doi:10.1038/s42003-021-02204-z), 2021-06-08
Supplement: 42003_2021_2204_MOESM2_ESM.pdf [file 42003_2021_2204_MOESM2_ESM.pdf]

## **Description of Additional Supplementary Files**

**File name:** Supplementary Data 1

**Description:** Source data underlying the main Figures.
